# Supplementary material for: A meta-analysis of pre-pregnancy maternal body mass index and placental DNA methylation identifies 27 CpG sites with implications for mother-child health
Source: PubMed Central journal article supplement (PMC9709064; doi:10.1038/s42003-022-04267-y), 2022-11-30
Supplement: 42003_2022_4267_MOESM3_ESM.pdf [file 42003_2022_4267_MOESM3_ESM.pdf]

## Description of Additional Supplementary Files

**File name:** Supplementary Data 1

**Description:** Distribution of maternal BMI, demographic variables, birth outcomes, and covariates, by cohort. IQR = Inter Quartile Range.

**File name:** Supplementary Data 2

**Description:** Effective number of probes, number of Bonferroni significant CpGs and lambda values for the cohort-specific models, adjusted and unadjusted for cellular heterogeneity. The number of components capturing cellular heterogeneity used for each cohort is also defined.

**File name:** Supplementary Data 3

**Description:** Meta-analysis results for the association between maternal ppBMI and placental DNAm, adjusted for cellular heterogeneity.

**File name:** Supplementary Data 4

**Description:** Meta-analysis results for the association between maternal ppBMI and placental DNAm, unadjusted for cellular heterogeneity.

**File name:** Supplementary Data 5

**Description:** Enrichment for functional pathways among CpGs associated with maternal ppBMI, annotated to the closest gene from the Illumina annotation file.

**File name:** Supplementary Data 6

**Description:** SNPs associated with birth weight and their proximity to CpGs associated with maternal ppBMI in placenta.

**File name:** Supplementary Data 7

**Description:** CpGs associated with maternal ppBMI in placenta and cord blood.

**File name:** Supplementary Data 8

**Description:** CpG positions discarded due to a detection p-value > 0.01 in each cohort.

**File name:** Supplementary Data 9

**Description:** Numerical source data for Figure 3.
